# Supplementary material for: Co-Pyrolysis of Cotton Stalks and Low-Density Polyethylene to Synthesize Biochar and Its Application in Pb(II) Removal
Source: MDPI journal article supplement (doi:10.3390/molecules27154868), 2022-07-29
Supplement: s1 [file s1]

Text S1 The analysis of adsorption kinetic and isotherm of Pb(II) on biochar

Pseudo-first order (Eq.1), pseudo-second order (Eq.2), and Elovich (Eq.3) models were used to fit the data of adsorption kinetic, which are expressed as followed:

$$Q_t = Q_e(1 - e^{-k_1 t}) \quad (1)$$

$$Q_t = (Q_e^2 k_2 t) / (1 + Q_e k_2 t) \quad (2)$$

where  $Q_t$  ( $\text{mg g}^{-1}$ ) and  $Q_e$  ( $\text{mg g}^{-1}$ ) are the amounts of Pb(II) adsorbed at time  $t$  and at equilibrium, respectively,  $k_1$  ( $\text{h}^{-1}$ ) represents the rate constant of pseudo-first-order model, and  $k_2$  is the rate constant of the pseudo second-order model ( $\text{g mg}^{-1} \text{h}^{-1}$ ).

$$Q_t = a + b \ln(t) \quad (3)$$

where  $Q_t$  ( $\text{mg g}^{-1}$ ) is the amounts of Pb(II) adsorbed at time  $t$ ,  $a$ , and  $b$  are constants.

The Langmuir (Eq. 4) and Freundlich (Eq. 5) model were applied to simulate the adsorption isotherm data.

$$Q_e = K_L q_{\max} C_e / (1 + K_L C_e) \quad (4)$$

where  $Q_e$  ( $\text{mg g}^{-1}$ ) and  $C_e$  ( $\text{mg L}^{-1}$ ) are the adsorbed amount of Pb(II) by biochar and Pb(II) concentration at equilibrium solution,  $K_L$  ( $\text{L mg}^{-1}$ ) is the Langmuir affinity constant, and  $q_{\max}$  ( $\text{mg g}^{-1}$ ) is the theoretical maximum adsorption capacity as the monolayer surface is completely covered.

$$Q_e = K_F C_e^{1/n} \quad (5)$$

where  $K_F$  [ $(\text{mg g}^{-1}) (\text{L mg}^{-1})^{1/n}$ ] and  $n$  are the constants related to adsorption capacity and intensity, respectively.

**Table S1.** The TG-DTG characteristic parameters of cotton stalk, LDPE and their mixture.

|      | First Stage    |                |                  |                                    | Second Stage   |                |                  |                                    |
|------|----------------|----------------|------------------|------------------------------------|----------------|----------------|------------------|------------------------------------|
|      | T <sub>i</sub> | T <sub>f</sub> | T <sub>max</sub> | Residue at T <sub>max</sub><br>(%) | T <sub>i</sub> | T <sub>f</sub> | T <sub>max</sub> | Residue at T <sub>max</sub><br>(%) |
| CS   | 190.2          | 382.6          | 348.8            | 50.19                              | -              | -              | -                | -                                  |
| LDPE | -              | -              | -                | -                                  | 390.5          | 503.9          | 474.6            | 35.06                              |
| C3P1 | 189.9          | 382.1          | 347.2            | 64.06                              | 433.7          | 505.3          | 476.8            | 34.60                              |
| C2P1 | 189.5          | 382.4          | 345.7            | 67.97                              | 431.5          | 505.0          | 479.8            | 34.35                              |
| C1P1 | 189.3          | 381.8          | 344.3            | 76.27                              | 425.9          | 504.5          | 480.5            | 34.59                              |

**Table S2.** The maximum Pb(II) adsorption capacities of biochar co-pyrolyzed by cotton stalk and LDPE, other biomass.

| Adsorption Conditions      |                          | Q <sub>max</sub> (mg/g) | Ref.          |
|----------------------------|--------------------------|-------------------------|---------------|
| Cotton stalk+LDPE          | pH = 5.0, t = 24 h, 303K | 199.82                  | in this study |
| Rice husk                  | pH = 5.0, t = 24 h, 298K | 2.40                    | [1]           |
| Pinewood                   | pH = 5.0, t = 24 h, 298K | 4.25                    |               |
| British broadleaf hardwood | pH = 5.0, t = 24 h, 293K | 47.66                   | [2]           |
| Corn stalk                 | pH = 5.5, t = 12h, 298K  | 49.70                   | [3]           |
| Rice husk                  | -                        | 26.70                   | [4]           |
| Pine needle                | pH = 5.0, t = 48 h, 308K | 40.43                   | [5]           |
| Saw dust                   | pH = 5.0, t = 24 h, 298K | 62.68                   | [6]           |

- [1] Z. Liu, F.-S. Zhang, Removal of lead from water using biochars prepared from hydrothermal liquefaction of biomass, *Journal of Hazardous Materials*, 167 (2009) 933-939.
- [2] Z. Shen, F. Jin, F. Wang, O. McMillan, A. Al-Tabbaa, Sorption of lead by Salisbury biochar produced from British broadleaf hardwood, *Bioresource Technology*, 193 (2015) 553-556.
- [3] L. Liu, Y. Huang, S. Zhang, Y. Gong, Y. Su, J. Cao, H. Hu, Adsorption characteristics and mechanism of Pb(II) by agricultural waste-derived biochars produced from a pilot-scale pyrolysis system, *Waste Management*, 100 (2019) 287-295.
- [4] J. Shi, X. Fan, D.C.W. Tsang, F. Wang, Z. Shen, D. Hou, D.S. Alessi, Removal of lead by rice husk biochars produced at different temperatures and implications for their environmental utilizations, *Chemosphere*, 235 (2019) 825-831.
- [5] V. Choudhary, M. Patel, C.U. Pittman, D. Mohan, Batch and Continuous Fixed-Bed Lead Removal Using Himalayan Pine Needle Biochar: Isotherm and Kinetic Studies, *ACS Omega*, 5 (2020) 16366-16378.

[6] S. Cheng, Y. Liu, B. Xing, X. Qin, C. Zhang, H. Xia, Lead and cadmium clean removal from wastewater by sustainable biochar derived from poplar saw dust, Journal of Cleaner Production, 314 (2021) 128074.

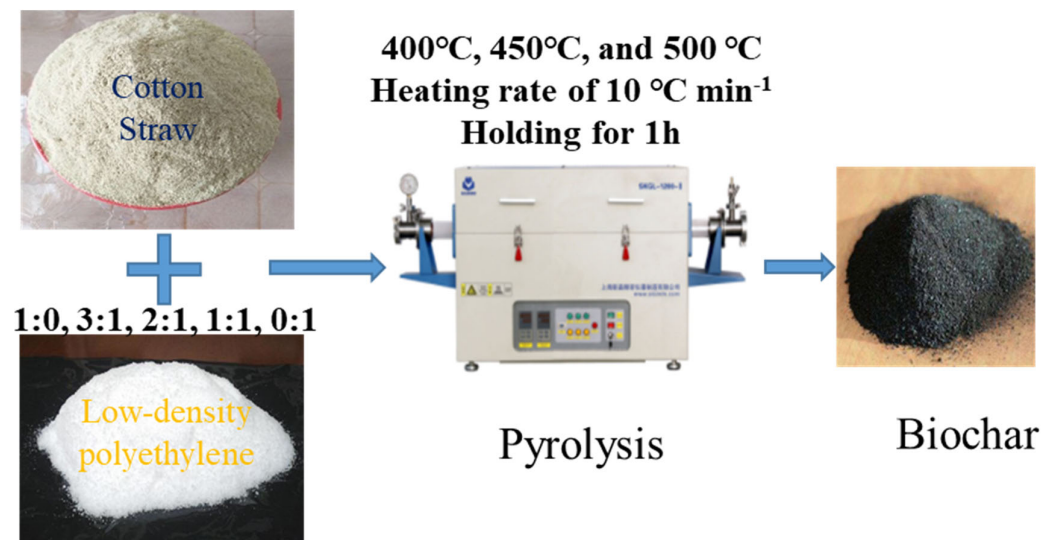

**Figure S1.** The experimental setup of vertical pyrolysis furnace.
